# Supplementary material
Source: Copernicus journal article supplement (doi:10.5194/egusphere-2026-2241)
Supplement: Supplementary file 1 [file egusphere-2026-2241-supplement.pdf]

1

2

3

## Supplementary information

4

5

6

7

8 **This file includes:**

9     Supplementary Texts

10    Supplementary Figures

11    Supplementary Tables

12    Reference

13

## 14 Supplementary Text

### 15 Text S1 Derivation of Derived Ecological Metrics from Model Parameters

#### 16 Text S1.1 Mathematical formulation of leaf phenology and realized leaf lifespan

17 In the DALEC model configurations used in this study (the " $\beta$  - JS" setup), leaf phenology is simulated by the  
18 Combined Deciduous-Evergreen Analytical (CEDA) scheme. According to the model formulation, the instantaneous  
19 leaf fall factor  $\Phi_{\text{fall}}(t)$ , which defines the daily fraction of the foliar carbon pool turned over at day  $t$ , is calculated as:

$$20 \quad \Phi_{\text{fall}}(t) = \frac{\sqrt{2}}{\sqrt{\pi \times c_{\text{rfall}}}} \left( -\ln \left( 1 - \frac{1}{\tau_{\text{foliar}}} \right) \right) \times e^{-\left( \frac{365.25 \times \sqrt{2} \times \sin \left( \frac{\pi(t - d_{\text{fall}} + \Psi)}{365.25} \right) \right)^2}{\pi \times c_{\text{rfall}}} \right)} \quad (\text{S1})$$

21 where  $c_{\text{rfall}}$  controls the duration of the leaf fall period,  $\tau_{\text{foliar}}$  controls the amplitude of the function,  $d_{\text{fall}}$  determines  
22 the day of year corresponding to the peak leaf fall rate,  $\Psi$  is a phase offset function dependent on  $c_{\text{rfall}}$  and  $\tau_{\text{foliar}}$  (Fig.  
23 S1).

24 The true annual turnover fraction ( $\Phi_{\text{annual}}$ ) is then derived by integrating the instantaneous rate over an annual cycle:

$$25 \quad \Phi_{\text{annual}} = \int_0^{365.25} \Phi_{\text{fall}}(t) dt \quad (\text{S2})$$

26 and the realized leaf lifespan ( $\tau_{\text{real}}$ ) is defined as the inverse of this integrated turnover:

$$27 \quad \tau_{\text{real}} = \frac{1}{\Phi_{\text{annual}}} \quad (\text{S3})$$

28 In this study, all reported "leaf lifespan" refer to  $\tau_{\text{real}}$ , providing a more accurate representation the mean residence time  
29 of foliar carbon than the raw parameter  $\tau_{\text{foliar}}$ .

#### 30 Text S1.2 Net Primary Productivity (NPP) Allocation Fractions

31 The DALEC configuration used in this study employs a hierarchical allocation scheme to partition NPP into the four  
32 live pools: foliar, labile, fine roots, and wood. This approach ensures that the sum of allocation fractions is always  
33 100%. We derived the allocation percentages for the canopy ( $A_{\text{leaf}}$ ), fine roots ( $A_{\text{root}}$ ), and wood ( $A_{\text{wood}}$ ) from the raw  
34 model parameters ( $f_{\text{lab}}$ ,  $f_{\text{fol}}$ ,  $f_{\text{root}}$ ) as follows:

$$35 \quad A_{\text{leaf}} = \left[ f_{\text{fol}} + f_{\text{lab}} \times (1 - f_{\text{fol}}) \right] \times 100\% \quad (\text{S4})$$

$$36 \quad A_{\text{root}} = (100\% - A_{\text{leaf}}) \times f_{\text{root}} \quad (\text{S5})$$

$$37 \quad A_{\text{wood}} = 100\% - A_{\text{leaf}} - A_{\text{root}} \quad (\text{S6})$$

### 38 Text S2 Formulation of the Normalized Nash-Sutcliffe Efficiency

39 To balance the contribution of multiple data output with different units and magnitudes, we utilized the Normalized  
40 Nash-Sutcliffe Efficiency (NNSE) as the objective function for all observational constraints.

41 The standard Nash-Sutcliffe Efficiency (NSE) is defined as (Nash & Sutcliffe, 1970):

$$42 \quad NSE = 1 - \frac{\sum_{t=1}^N (O_t - M_t)^2}{\sum_{t=1}^N (O_t - \bar{O})^2} \quad (\text{S7})$$

43 where  $O_t$  is the observed value,  $M_t$  is the modeled value, and  $\bar{O}$  is the mean of observations. Since NSE ranges from  
44  $-\infty$  to 1, extremely poor model performance (large negative NSE) can cause unstable gradients during optimization.  
45 The NNSE transforms the NSE into a bounded range of (0, 1]:

$$46 \quad NNSE = \frac{1}{2 - NSE} \quad (S8)$$

47 In our loss function, we maximize NNSE (or minimize  $-NNSE$ ). This formulation ensures that the loss for each data  
48 output is bounded between -1 (perfect fit) and 0 (infinitely poor fit), preventing any single data output from dominating  
49 the joint optimization process solely due to scaling issues.

### 50 **Text S3 Independent Validation using Field-based Allocation Data**

51 To independently validate the calibrated parameters, we utilized a global dataset of forest biomass allocation derived  
52 from field measurements (Xia et al., 2019). Since the field data are point-based, we aggregated all plots falling within  
53 each  $0.5^\circ \times 0.5^\circ$  grid cell to match the spatial resolution of our model outputs.

54 Establishing a consistent benchmark for these allocation data required reference forest growth trajectories. As the  
55 biomass growth curves used in this study (Xu et al., 2026) are specific to the boreal zone, we incorporated additional  
56 datasets to characterize growth potentials for validation sites located in other regions. We utilized the forest recovery  
57 curves from (Ritter et al., 2025) for sites within the non-boreal regions of Europe and the spatially explicit growth  
58 curves from (Robinson et al., 2025) for other non-boreal regions. Because these external datasets differ in spatial  
59 resolution (18 km and 1 km, respectively) from our model grid, we applied an aggregation procedure to generate  
60 compatible constraints. For each  $0.5^\circ$  grid cell containing validation points, we calculated biomass accumulation  
61 trajectories (0–100 years) for all underlying high-resolution pixels and averaged them to produce a single,  
62 representative biomass growth curve.

63

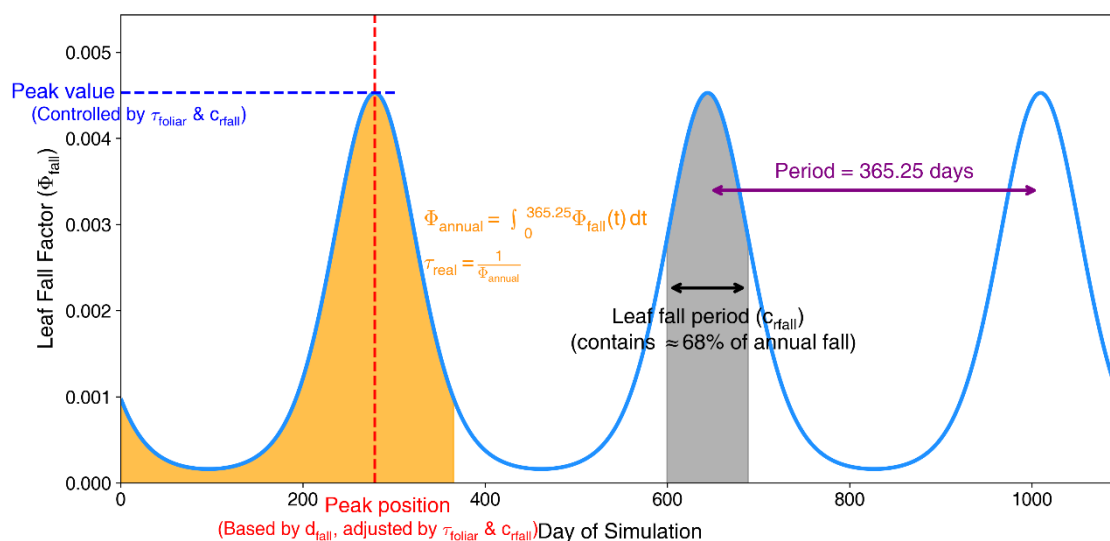

65

66 **Fig. S1 Schematic illustration of the seasonal leaf fall dynamics and the derivation of the realized leaf lifespan.**

67 The blue curve represents the instantaneous leaf fall factor ( $\Phi_{\text{fall}}$ ) simulated by the CEDA scheme over time. The shape  
 68 of the curve is governed by key model parameters: the peak timing is determined by  $d_{\text{fall}}$ , the duration of the fall period  
 69 is controlled by  $c_{\text{rfall}}$  (gray shaded region), and the amplitude is adjusted by  $\tau_{\text{foliar}}$ . The true annual turnover fraction  
 70 ( $\Phi_{\text{annual}}$ , orange shaded area) is obtained by integrating  $\Phi_{\text{fall}}$  over a full annual cycle (365.25 days). The realized leaf  
 71 lifespan ( $\tau_{\text{real}}$ ) is then defined as the inverse of this integrated turnover ( $\Phi_{\text{annual}}$ ).

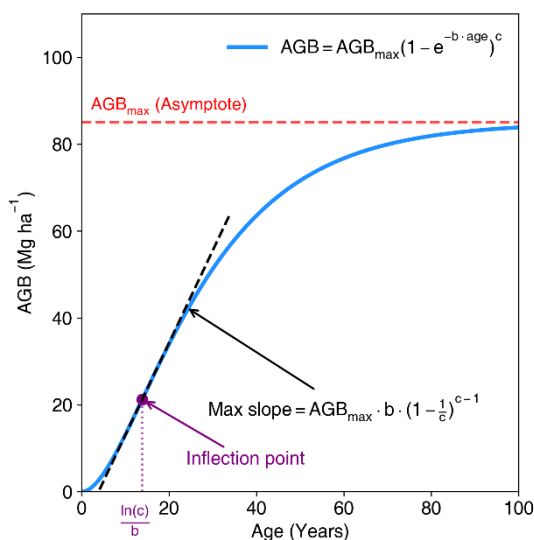

72

73 **Fig. S2 Visualization of key parameters in the Richards-Chapman growth function.** The plot illustrates the  
 74 geometric correspondences of the maximum asymptotic capacity ( $AGB_{\text{max}}$ ), growth rate parameter ( $b$ ), and shape  
 75 parameter ( $c$ ) on the growth curve.

76

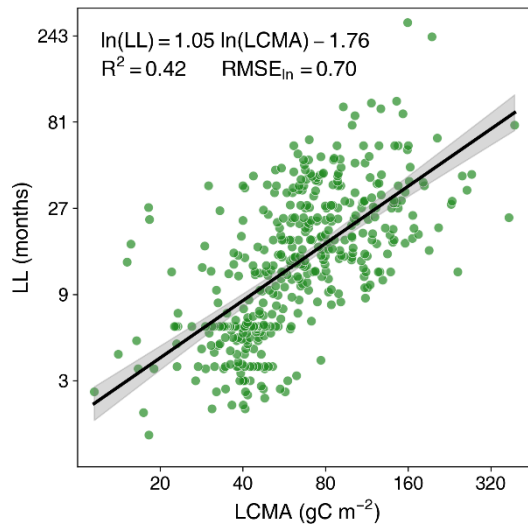

77

78 **Fig. S3 The log-linear relationship between leaf lifespan (LL) and leaf carbon mass per area (LCMA).** Dots  
 79 represent the compiled measurements from the global leaf trait dataset (Wang et al., 2023). The red line indicates the  
 80 fitted linear regression on log-transformed data, with the gray shaded area representing the 95% confidence interval.  
 81 The goodness of fit is indicated by an  $R^2$  of 0.42 and an RMSE of 0.70 (on log-transformed data). This functional  
 82 relationship serves as a prior constraint in the model calibration to enforce the physiological trade-off between leaf  
 83 longevity and construction cost.

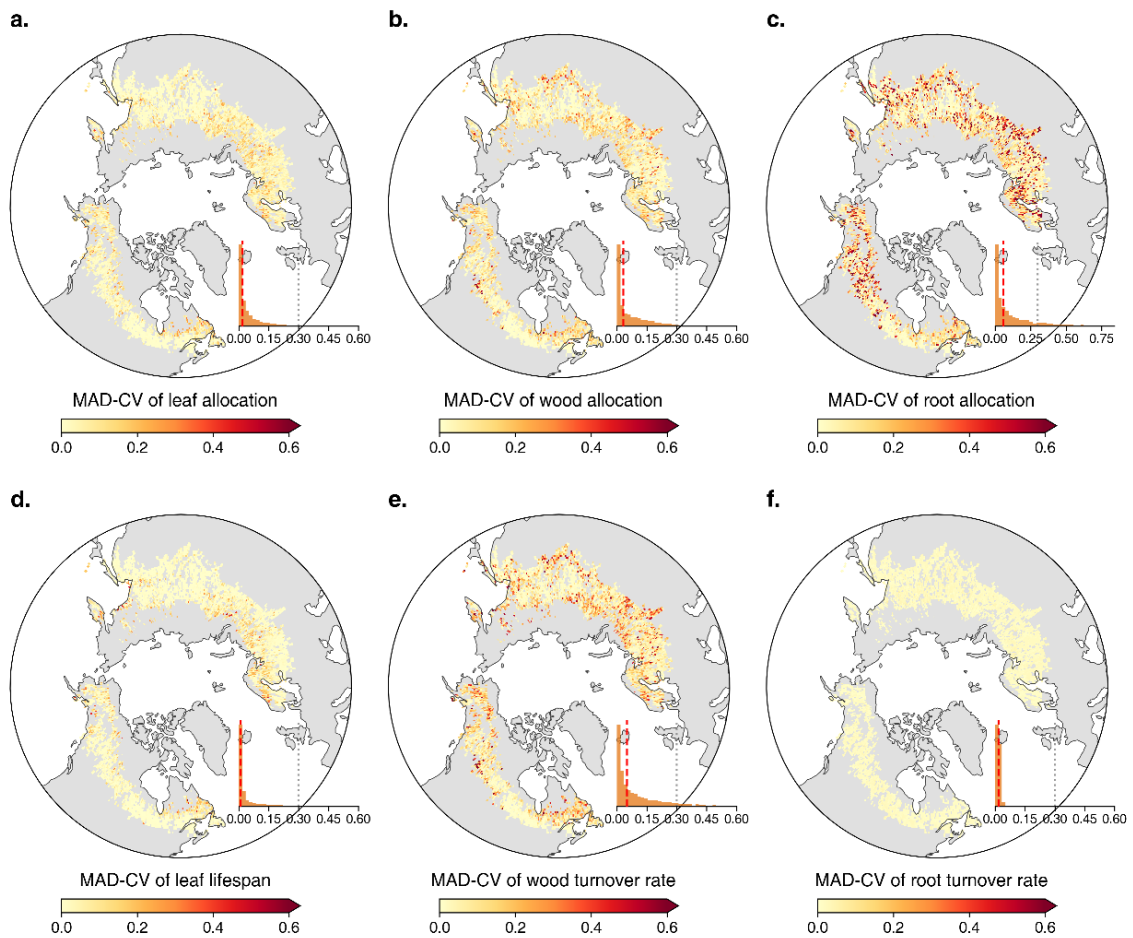

84

85 **Fig. S4 Spatial distributions of the robust coefficient of variation (MAD-CV) for six key parameters under the growth-**  
 86 **curve-constrained scenario.**  $MAD-CV = 1.4826 \times MAD / Median$ , where MAD is the median absolute deviation.

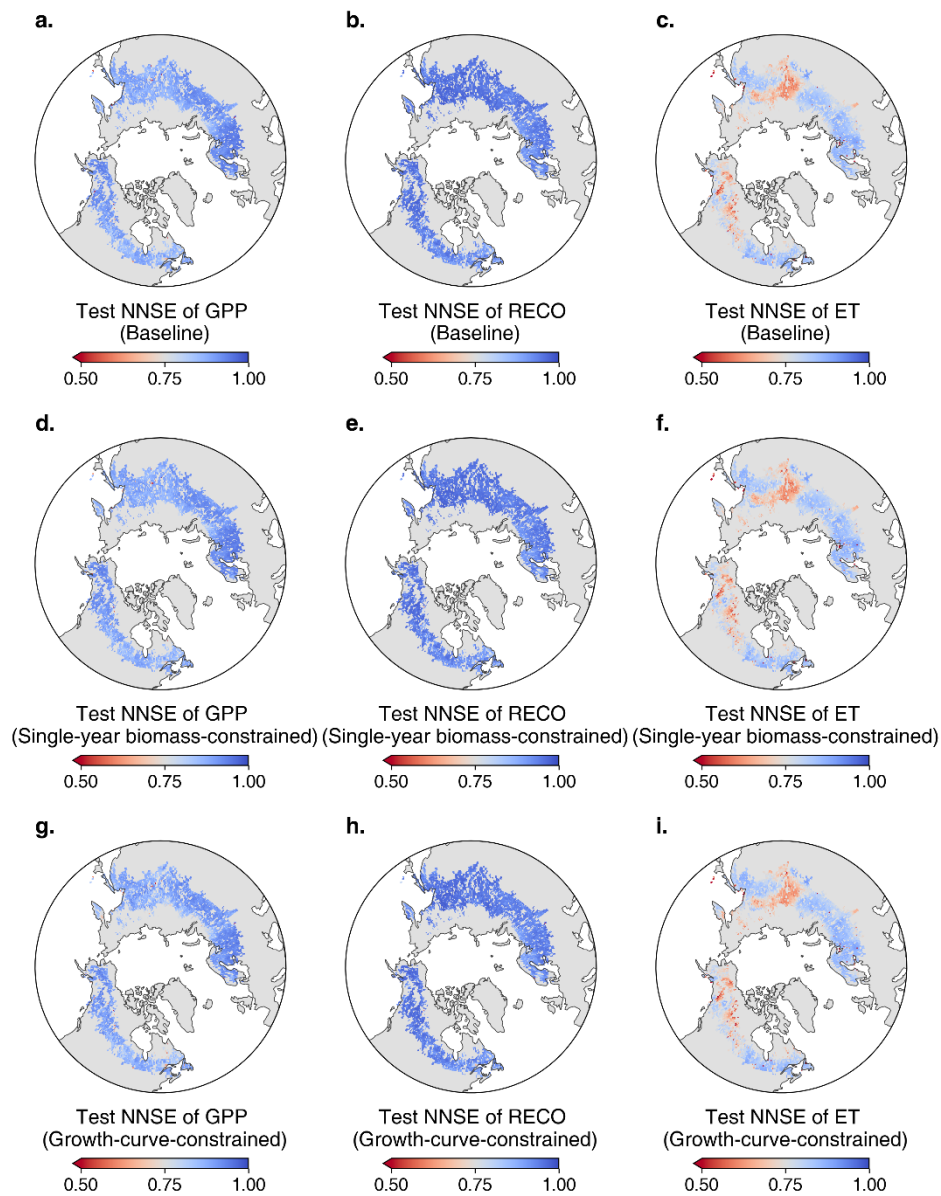

87

88

89

90

91

92

93

**Fig. S5 Evaluation of model performance for model fast processes outputs.** Spatial distribution of the Normalized Nash-Sutcliffe Efficiency (NNSE) on the independent test set (2013–2019) for GPP, RECO, and ET. (a–c) Results from the baseline experiment. (d–f) Results from the single-year biomass-constrained experiment. (g–i) Results from the growth-curve-constrained experiment. High NNSE values (approaching 1, shown in blue) indicate high model accuracy. The similarity across all three rows demonstrates that assimilating slow-process constraints (single-year biomass or forest recovery curves) does not compromise the ability of the model to reproduce fast-process dynamics.

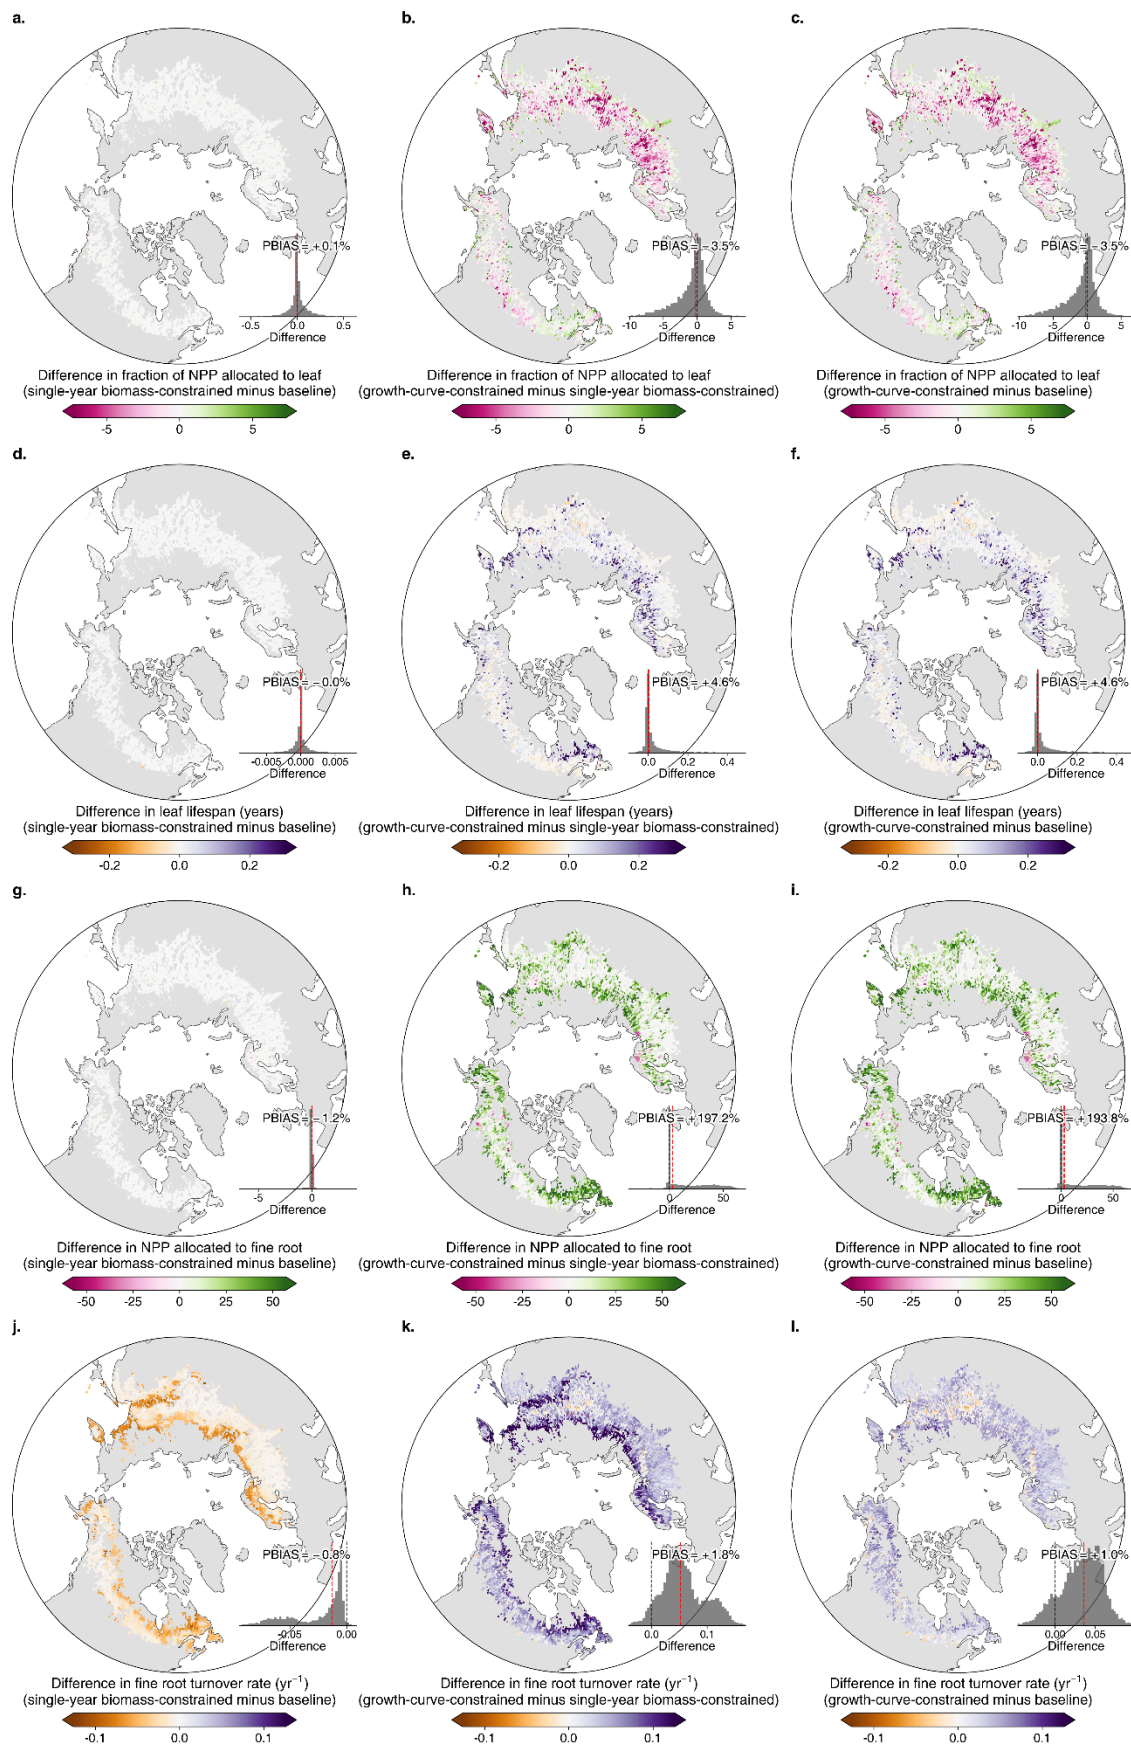

94

95

96

97

98

**Fig. S6 Changes in leaf and fine root carbon turnover allocation across different biomass constraints.** Spatial difference maps showing the changes in calibrated parameters among the baseline, single-year biomass-constrained, and growth-curve-constrained experiments. Difference in (a–c) the fraction of NPP allocated to leaf, (d–f) leaf lifespan, (g–i) the fraction of NPP allocated to fine roots, and (j–l) fine root turnover rate.

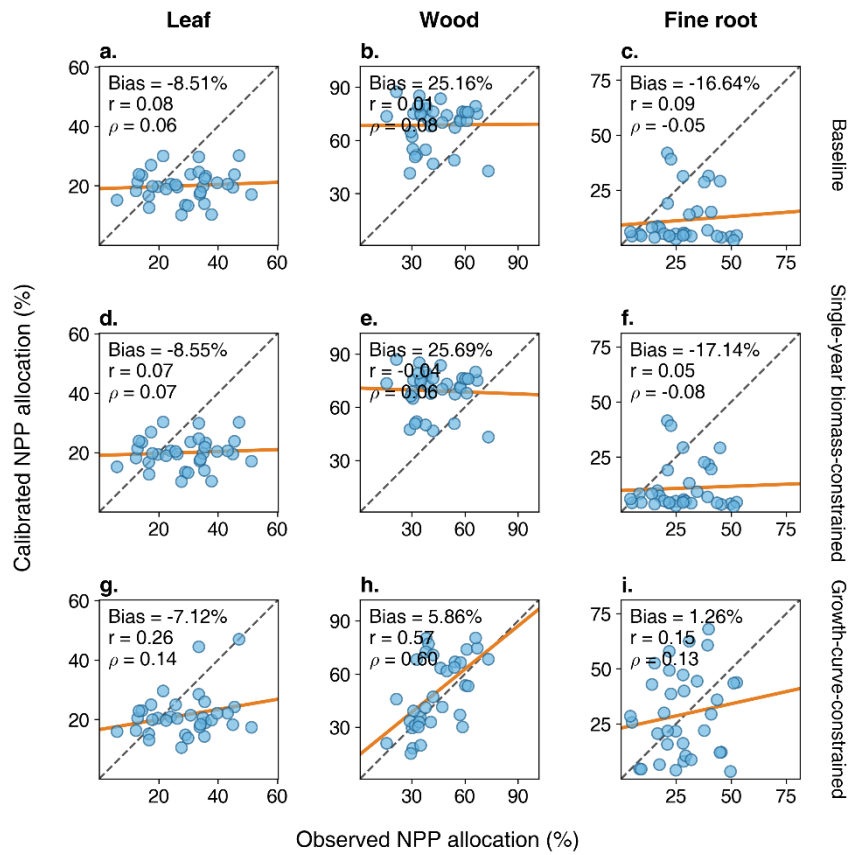

99

100 **Fig. S7 Independent validation of calibrated NPP allocation fractions against field measurements.** Comparison  
 101 of the calibrated NPP allocation fractions against a global dataset of field measurements (Xia et al., 2019) for (a, d, g)  
 102 leaf, (b, e, h) wood, and (c, f, i) fine root. (a–c) Results from the baseline experiment. (d–f) Results from the single-  
 103 year biomass-constrained experiment. (g–i) Results from the growth-curve-constrained experiment. Performance is  
 104 quantified using mean bias (average difference between calibrated and observed value), Pearson correlation coefficient  
 105 (r), and Spearman's rank correlation coefficient (ρ).

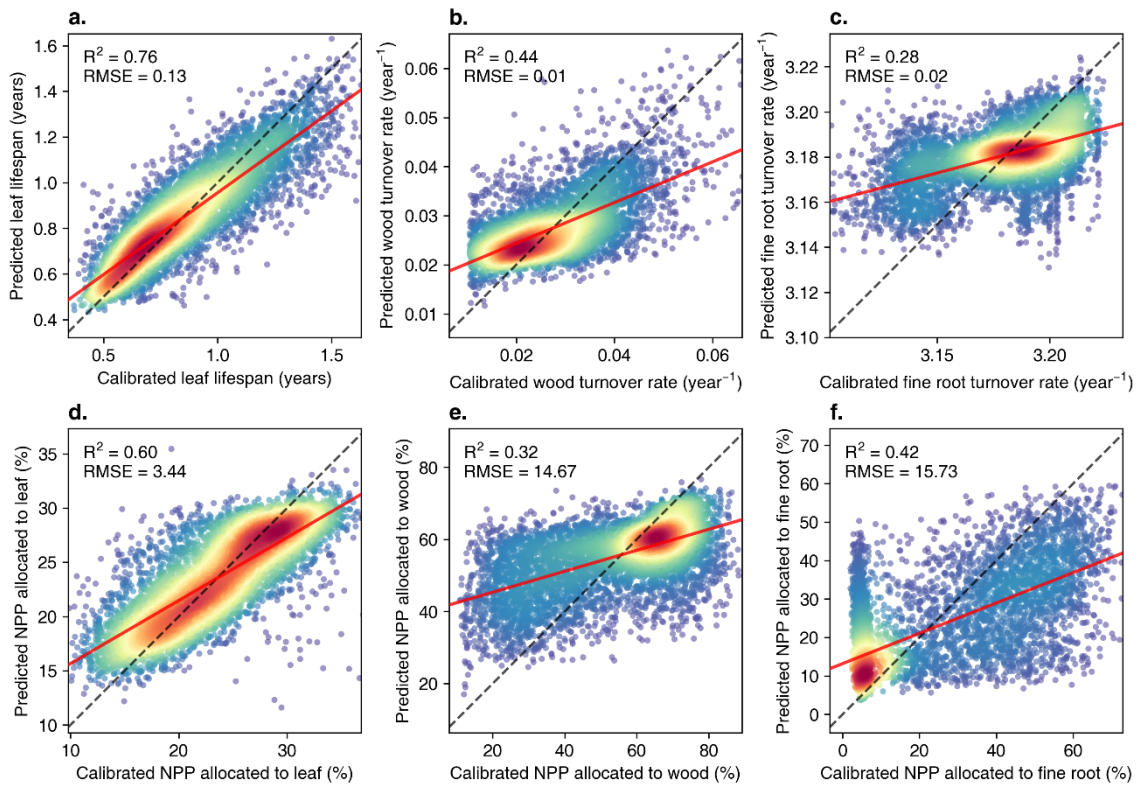

106

107 **Fig. S8 Predictive performance of machine learning models for the calibrated ecological parameters.** Scatter  
 108 plots comparing the calibrated results (x-axis, derived from the DifferLand assimilation) against the predictions made  
 109 by the gradient boosting regressor models (y-axis) based on climate, soil, and vegetation drivers. The comparisons  
 110 include (a) leaf lifespan, (b) wood turnover rate, (c) fine root turnover rate, and the fraction of NPP allocated to (d)  
 111 leaf, (e) wood, and (f) fine root.

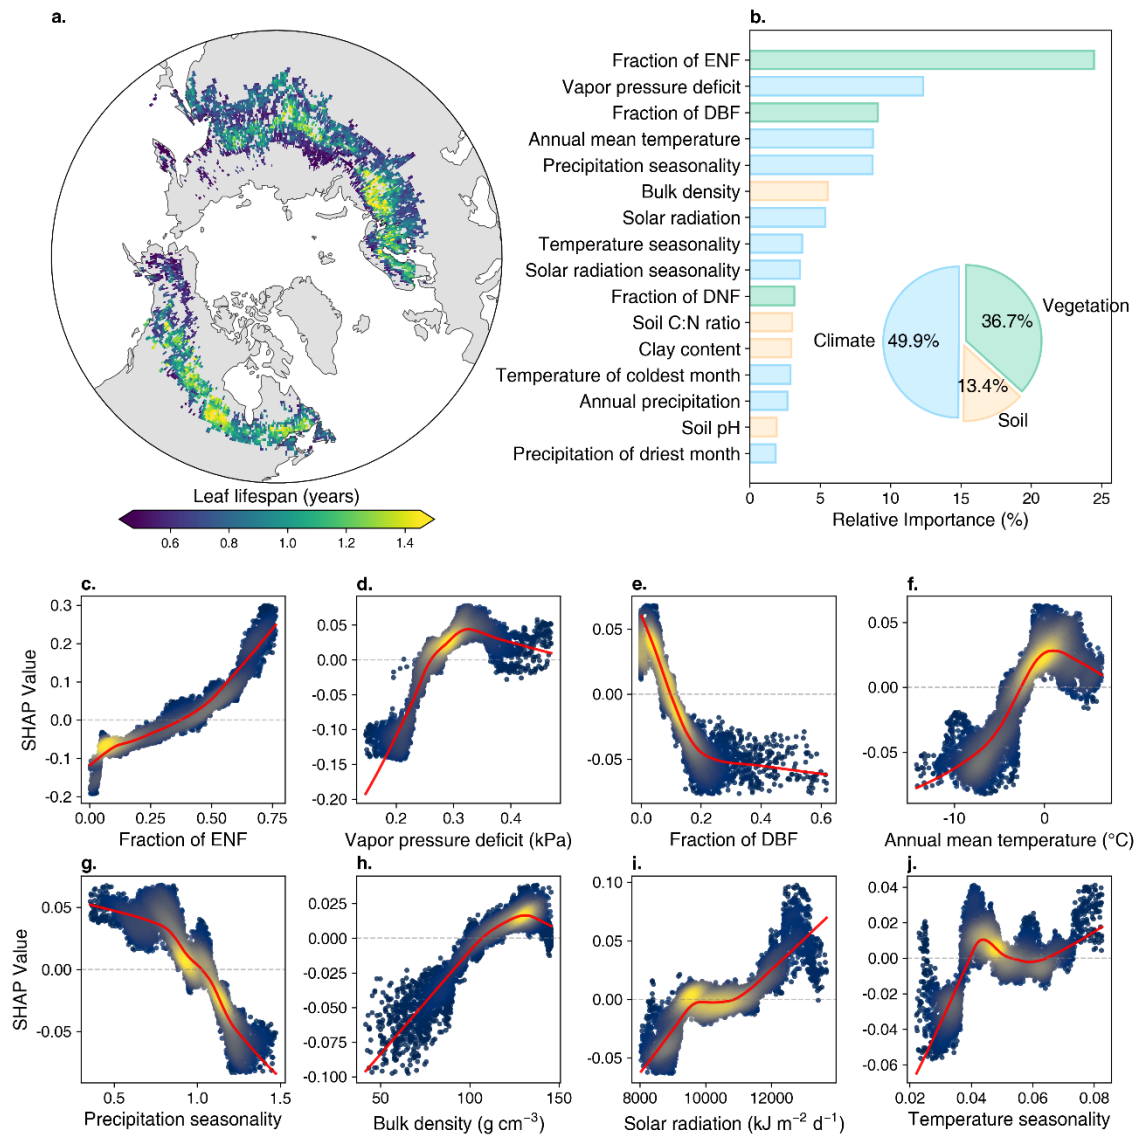

**Fig. S9** Same as Fig. 3 but for the leaf lifespan.

112

113

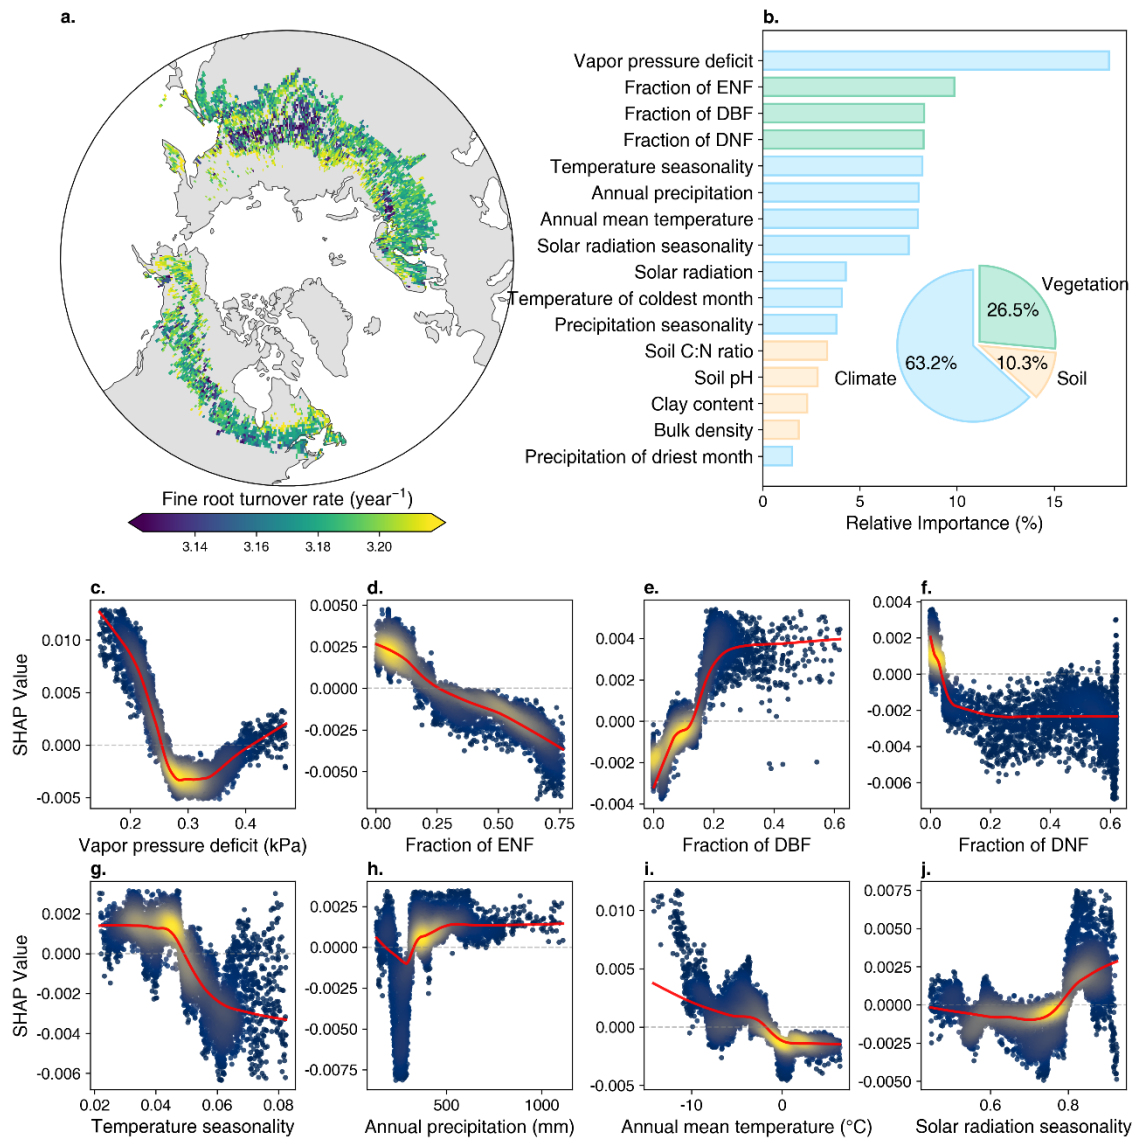

114

115

**Fig. S10** Same as Fig. 3 but for the root turnover rate.

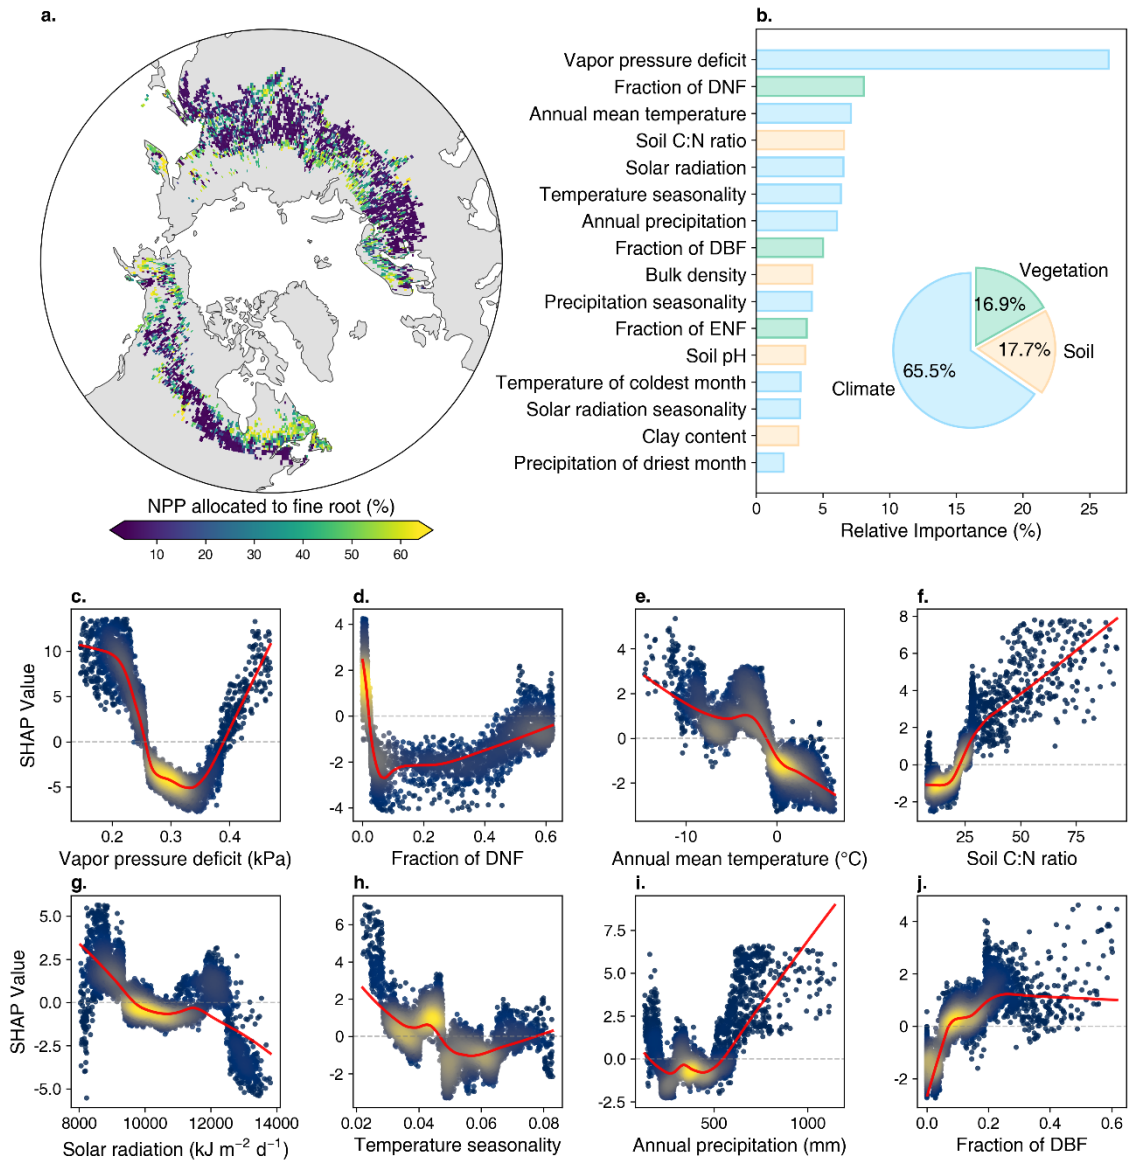

116

117

118

**Fig. S11** Same as Fig. 3 but for the fraction of NPP allocated to fine root.

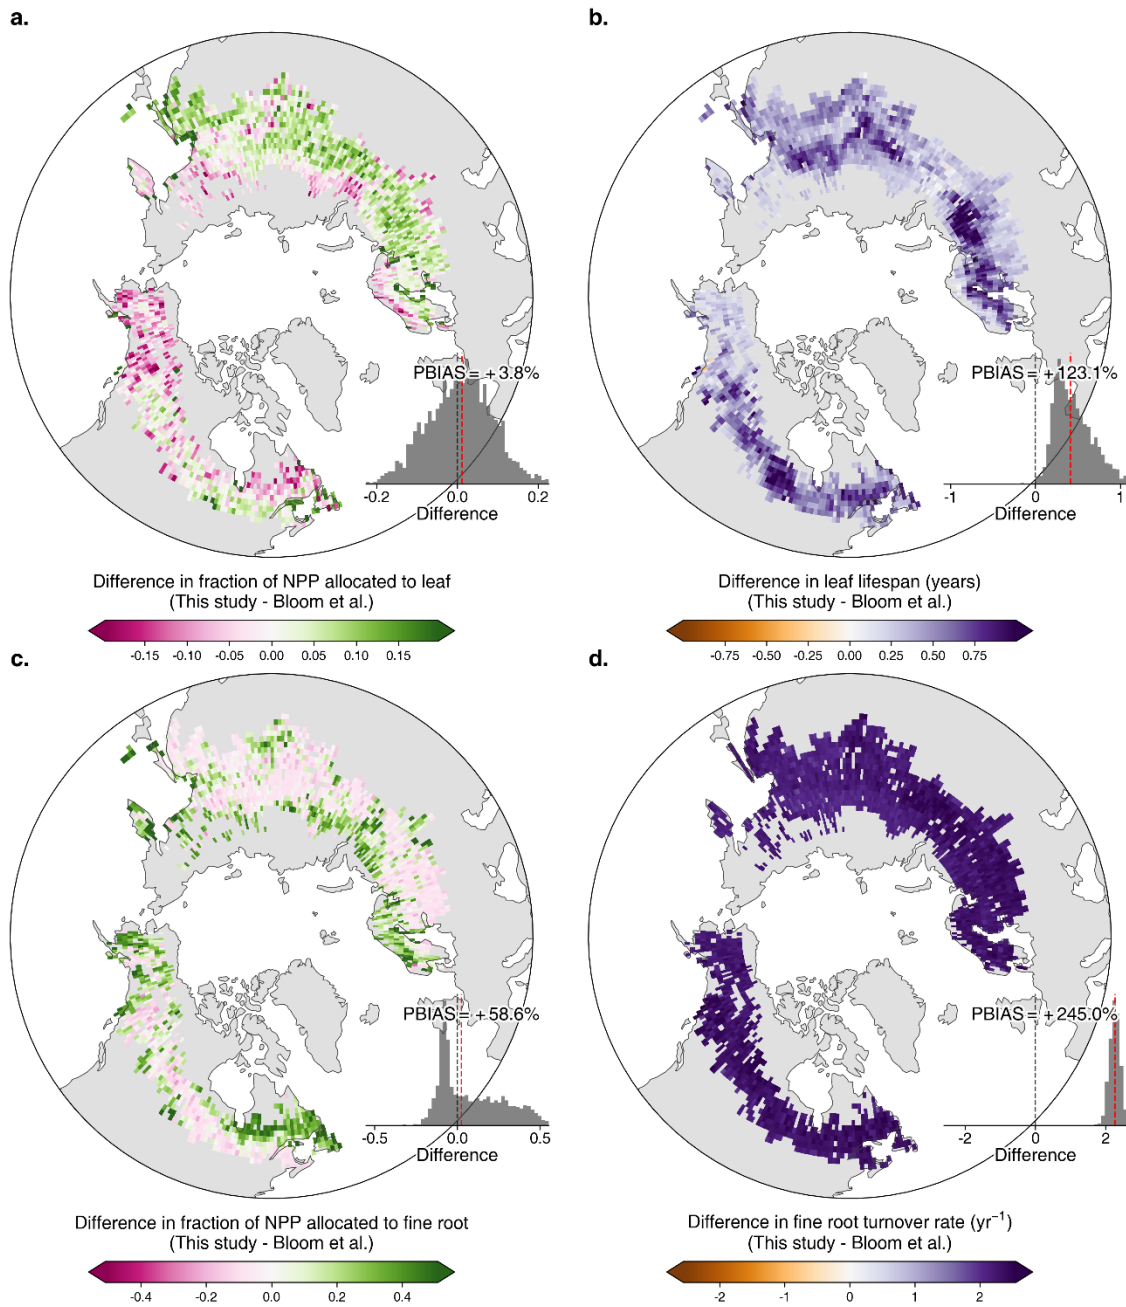

119

120

121

122

**Fig. S12** Same as Fig. 6 but for (a) NPP allocation fraction to leaf, (b) leaf lifespan, (c) NPP allocation fraction to fine root, (d) fine root turnover rate.

123 **Supplementary Tables**

124 **Table S1 Physical parameters in DALEC2.** There are a total of 34 parameters, including 26 physical parameters  
 125 and 8 initial pools. PAW and PUW is the abbreviation of plant available water and plant unavailable water pool. The  
 126 model version we used does not use parameters related to PUW (in italic).

| Parameter              | Description                                                                                     | Unit                                                     | Min                  | Max             | Note |
|------------------------|-------------------------------------------------------------------------------------------------|----------------------------------------------------------|----------------------|-----------------|------|
| $f_{\text{auto}}$      | Fraction of GPP allocated to the autotrophic respiration                                        | unitless                                                 | 0.2                  | 0.8             | 1    |
| $f_{\text{lab}}$       | Fraction of NPP allocated to the labile pool                                                    | unitless                                                 | 0.01                 | 0.5             | 1    |
| $f_{\text{fol}}$       | Fraction of (NPP – labile production) allocated to the foliar pool                              | unitless                                                 | 0.01                 | 0.5             | 1    |
| $f_{\text{root}}$      | Fraction of (NPP – labile production – foliar production) allocated to the root pool            | unitless                                                 | 0.01                 | 1               | 1    |
| $\tau_{\text{lab}}$    | Residence time of C in the labile pool                                                          | year                                                     | 1.001                | 8               | 1    |
| $\tau_{\text{foliar}}$ | Residence time of C in the leaf pool                                                            | year                                                     | 1.001                | 8               | 1    |
| $k_{\text{wood}}$      | C turnover rate of the wood pool                                                                | day <sup>-1</sup>                                        | $2.5 \times 10^{-7}$ | 0.001           | 1    |
| $k_{\text{root}}$      | C turnover rate of the fine root pool                                                           | day <sup>-1</sup>                                        | 0.0001               | 0.01            | 1    |
| $k_{\text{litter}}$    | C turnover rate of the litter pool                                                              | day <sup>-1</sup>                                        | 0.0001               | 0.01            | 1    |
| $k_{\text{som}}$       | C turnover rate of the soil organic matter                                                      | day <sup>-1</sup>                                        | $10^{-7}$            | 0.001           | 1    |
| Q10                    | Temperature sensitivity of litter decomposition and heterotrophic respiration                   | unitless                                                 | 0.018                | 0.14            | 1    |
| ce                     | Nitrogen-limited canopy efficiency of the Aggregate Canopy Model                                | unitless                                                 | 5                    | 50              | 1    |
| $d_{\text{onset}}$     | Leaf onset day, on DOY = $d_{\text{onset}} \% 365.25$ labile C release rate reaches the maximum | unitless                                                 | 365.25               | 1461            | 1    |
| $c_{\text{ronset}}$    | Labile C release period                                                                         | day                                                      | 30.4375              | 100             | 1    |
| $d_{\text{fall}}$      | Leaf fall day, on DOY = $d_{\text{fall}} \% 365.25$ leaf fall rate reaches the maximum          | unitless                                                 | 365.25               | 1461            | 1    |
| $c_{\text{rfall}}$     | Leaf fall period                                                                                | day                                                      | 30.4375              | 150             | 1    |
| LCMA                   | Leaf carbon mass per area                                                                       | gC m <sup>-2</sup>                                       | 5                    | 200             | 1    |
| uWUE                   | Underlying water use efficiency                                                                 | gC kg H <sub>2</sub> O <sup>-1</sup> hPa <sup>-0.5</sup> | 0.5                  | 30              | 1    |
| Boese <sub>r</sub>     | Solar shortwave downward radiation adjustment factor to evapotranspiration                      | kg H <sub>2</sub> O MJ <sup>-1</sup>                     | 0.01                 | 0.3             | 1    |
| Qmax <sub>PAW</sub>    | Runoff focal point of the plant available water pool                                            | kg H <sub>2</sub> O m <sup>-2</sup>                      | 1                    | 10 <sup>5</sup> | 1    |
| PAW <sub>fc</sub>      | Field capacity for the PAW pool                                                                 | kg H <sub>2</sub> O m <sup>-2</sup>                      | 1                    | 10000           | 1    |

|                 |                                                                                 |                                         |                  |                       |          |
|-----------------|---------------------------------------------------------------------------------|-----------------------------------------|------------------|-----------------------|----------|
| $f_{wp}$        | Wilting point fraction as of field capacity                                     | unitless                                | 0.01             | 0.5                   | 1        |
| $\theta_p$      | Precipitation sensitivity of litter decomposition and heterotrophic respiration | unitless                                | 0.01             | 1                     | 1        |
| $k_{decomp}$    | Litter decomposition rate                                                       | day <sup>-1</sup>                       | 10 <sup>-5</sup> | 0.01                  | 1        |
| $X_{H2O}$       | <i>Fraction of water leaving the PAW pool being transferred to the PUW pool</i> | <i>unitless</i>                         | <i>0.01</i>      | <i>1</i>              | <i>1</i> |
| $Q_{maxPUW}$    | <i>Runoff focal point of the PUW pool</i>                                       | <i>kg H<sub>2</sub>O m<sup>-2</sup></i> | <i>1</i>         | <i>10<sup>5</sup></i> | <i>1</i> |
| $C_{lab, i}$    | Initial C stock in the labile pool                                              | gC m <sup>-2</sup>                      | 1                | 2000                  | 1        |
| $C_{fol, i}$    | Initial C stock in the foliar pool                                              | gC m <sup>-2</sup>                      | 1                | 2000                  | 1        |
| $C_{wood, i}$   | Initial C stock in the wood pool                                                | gC m <sup>-2</sup>                      | 1                | 10 <sup>5</sup>       | 1        |
| $C_{root, i}$   | Initial C stock in the fine root pool                                           | gC m <sup>-2</sup>                      | 1                | 2000                  | 1        |
| $C_{litter, i}$ | Initial C stock in the litter pool                                              | gC m <sup>-2</sup>                      | 1                | 2000                  | 1        |
| $C_{som, i}$    | Initial C stock in the soil organic matter pool                                 | gC m <sup>-2</sup>                      | 1                | 2000                  | 1        |
| $PAW_i$         | Initial water storage in the PAW pool                                           | kg H <sub>2</sub> O m <sup>-2</sup>     | 1                | 10000                 | 1        |
| $PUW_i$         | <i>Initial water storage in the PUW pool</i>                                    | <i>kg H<sub>2</sub>O m<sup>-2</sup></i> | <i>1</i>         | <i>10000</i>          | <i>1</i> |

127

128

129

130

131 **Table S2 Information of the drivers used in DALEC2.**

| <b>Driver</b>   | <b>Description</b>                         | <b>Unit</b>                          | <b>Data source</b>          |
|-----------------|--------------------------------------------|--------------------------------------|-----------------------------|
| $T_{max}$       | Daily maximum temperature                  | °C                                   | CRU-JRA v2.2                |
| $T_{min}$       | Daily minimum temperature                  | °C                                   | CRU-JRA v2.2                |
| SSRD            | Downward shortwave solar radiation         | MJ m <sup>-2</sup> day <sup>-1</sup> | CRU-JRA v2.2                |
| CO <sub>2</sub> | Atmospheric CO <sub>2</sub> concentrations | ppm                                  | TRENDY GCB2024              |
| VPD             | Vapor pressure deficit                     | hPa                                  | Derived from CRU-JRA v2.2 * |
| DOY             | Day of the year                            | \                                    | \                           |
| PREC            | Precipitation                              | mm day <sup>-1</sup>                 | CRU-JRA v2.2                |
| Lat             | Latitude                                   | \                                    | \                           |

132 \* We calculated it as  $VPD = 0.6108 \times e^{\frac{17.27 \times T_{air}}{T_{air} + 237.3} - \frac{q_{air} \times P_{surf}}{0.378 \times q_{air} + 0.622}}$ , in which  $T_{air}$  is air temperature (°C),  $q_{air}$  is specific  
133 humidity (g g<sup>-1</sup>),  $P_{surf}$  is surface pressure (kPa), and VPD is vapor pressure deficit (kPa) (Monteith &  
134 Unsworth, 2013; Tetens, 1930).

135 **Table S3 Information of the constraining data.**

| Constraint for | Time frequency | Data source                                                                                                                            |
|----------------|----------------|----------------------------------------------------------------------------------------------------------------------------------------|
| Biomass        | Yearly         | Derived from forest recovery curve (Huang et al., 2021; Xu et al., 2026)                                                               |
| GPP            | Daily          | Global MODIS and FLUXNET-derived Daily Gross Primary Production, V2 (Joiner & Yoshida, 2021)                                           |
| ET             | Daily          | GLEAM4 (Miralles et al., 2025)                                                                                                         |
| LAI            | 8 days         | GLASS LAI V6 (Ma & Liang, 2022)                                                                                                        |
| RECO           | 10-day means   | A Data-driven Upscale Product of Global Gross Primary Production, Net Ecosystem Exchange and Ecosystem Respiration (Zeng et al., 2020) |

136

137

138

139

140 **Table S4 Predictor variables for the machine learning models.**

| Category   | Variable                                            | Unit                               | Source                                            |
|------------|-----------------------------------------------------|------------------------------------|---------------------------------------------------|
| Climate    | Annual mean temperature                             | °C                                 | CRU-JRA v2.2                                      |
|            | Temperature of coldest month                        | °C                                 |                                                   |
|            | Temperature seasonality (Variation coefficient)     | -                                  |                                                   |
|            | Annual precipitation                                | mm                                 |                                                   |
|            | Precipitation of driest month                       | mm                                 |                                                   |
|            | Precipitation seasonality (Variation coefficient)   | -                                  |                                                   |
|            | Solar radiation                                     | $\text{kJ m}^{-2} \text{day}^{-1}$ |                                                   |
|            | Solar radiation seasonality (Variation coefficient) | -                                  |                                                   |
| Soil       | Vapor pressure deficit                              | kPa                                | The Global Soil Dataset for Earth System Modeling |
|            | Bulk density                                        | %                                  |                                                   |
|            | Clay content                                        | %                                  |                                                   |
|            | Soil pH                                             | -                                  |                                                   |
| Vegetation | Soil C:N ratio                                      | %                                  | ORCHIDEE                                          |
|            | Fraction of Evergreen Needleleaf Forest             | %                                  |                                                   |
|            | Fraction of Deciduous Broadleaved Forest            | %                                  |                                                   |
|            | Fraction of Deciduous Needleleaf Forest             | %                                  |                                                   |

141

142

143

144 **Reference**

- 145 Huang, Y., Ciais, P., Santoro, M., Makowski, D., Chave, J., Schepaschenko, D., et al. (2021). A global map of root  
146 biomass across the world's forests. *Earth System Science Data*, 13(9), 4263–4274.  
147 <https://doi.org/10.5194/essd-13-4263-2021>
- 148 Joiner, J., & Yoshida, Y. (2021). Global MODIS and FLUXNET-derived Daily Gross Primary Production, V2,  
149 ORNL DAAC, Oak Ridge, Tennessee, USA. *Earth Data [Data Set]*, 10.
- 150 Ma, H., & Liang, S. (2022). Development of the GLASS 250-m leaf area index product (version 6) from MODIS  
151 data using the bidirectional LSTM deep learning model. *Remote Sensing of Environment*, 273, 112985.  
152 <https://doi.org/10.1016/j.rse.2022.112985>
- 153 Miralles, D. G., Bonte, O., Koppa, A., Baez-Villanueva, O. M., Tronquo, E., Zhong, F., et al. (2025). GLEAM4:  
154 global land evaporation and soil moisture dataset at 0.1° resolution from 1980 to near present. *Scientific  
155 Data*, 12(1), 416. <https://doi.org/10.1038/s41597-025-04610-y>
- 156 Monteith, J. L., & Unsworth, M. H. (2013). Chapter 2 - Properties of Gases and Liquids. In J. L. Monteith & M. H.  
157 Unsworth (Eds.), *Principles of Environmental Physics (Fourth Edition)* (Fourth Edition, pp. 5–23). Boston:  
158 Academic Press. <https://doi.org/10.1016/B978-0-12-386910-4.00002-0>
- 159 Nash, J. E., & Sutcliffe, J. V. (1970). River flow forecasting through conceptual models part I — A discussion of  
160 principles. *Journal of Hydrology*, 10(3), 282–290. [https://doi.org/10.1016/0022-1694\(70\)90255-6](https://doi.org/10.1016/0022-1694(70)90255-6)
- 161 Ritter, F., Ciais, P., Senf, C., Santoro, M., Xu, Y., Pelissier-Tanon, A., et al. (2025, April 16). Alarming decline in the  
162 carbon sink of European forests driven by disturbances. Research Square. [https://doi.org/10.21203/rs.3.rs-  
163 3671432/v1](https://doi.org/10.21203/rs.3.rs-3671432/v1)
- 164 Robinson, N., Drever, C. R., Gibbs, D. A., Lister, K., Esquivel-Muelbert, A., Heinrich, V., et al. (2025). Protect  
165 young secondary forests for optimum carbon removal. *Nature Climate Change*, 15(7), 793–800.  
166 <https://doi.org/10.1038/s41558-025-02355-5>
- 167 Tetens, O. (1930). Über einige meteorologische Begriffe. *Z. Geophys*, 6, 297–309.
- 168 Wang, H., Colin Prentice, I., J. Wright, I., I. Warton, D., Qiao, S., Xu, X., et al. (2023). Leaf economics  
169 fundamentals explained by optimality principles. *Science Advances*. <https://doi.org/10.1126/sciadv.add5667>
- 170 Xia, J., Yuan, W., Lienert, S., Joos, F., Ciais, P., Viovy, N., et al. (2019). Global Patterns in Net Primary Production  
171 Allocation Regulated by Environmental Conditions and Forest Stand Age: A Model-Data Comparison.  
172 *Journal of Geophysical Research: Biogeosciences*, 124(7), 2039–2059.  
173 <https://doi.org/10.1029/2018JG004777>
- 174 Xu, Y., Ciais, P., & Li, W. (2026). Post-fire biomass recovery in boreal forest during the last three decades.
- 175 Zeng, J., Matsunaga, T., Tan, Z.-H., Saigusa, N., Shirai, T., Tang, Y., et al. (2020). Global terrestrial carbon fluxes of  
176 1999–2019 estimated by upscaling eddy covariance data with a random forest. *Scientific Data*, 7(1), 313.  
177 <https://doi.org/10.1038/s41597-020-00653-5>
